# Supplementary material for: A novel approach for kinetic measurements in exothermic fixed bed reactors: advancements in non-isothermal bed conditions demonstrated for methanol synthesis
Source: Royal Society of Chemistry journal article supplement (doi:10.1039/d1re00071c), 2021-01-01
Supplement: d1re00071c1.pdf [file d1re00071c1.pdf]

## Kinetic model by Graaf<sup>1</sup>

### Mechanism:

#### Adsorption

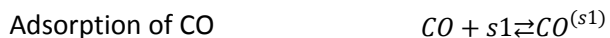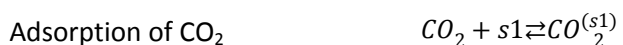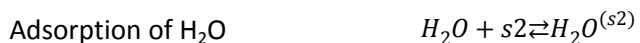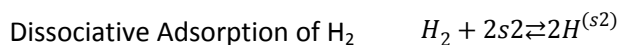

#### CO<sub>2</sub>-hydrogenation

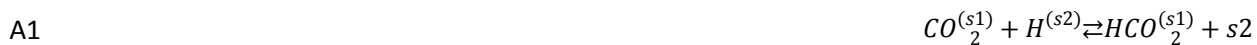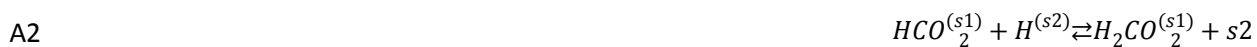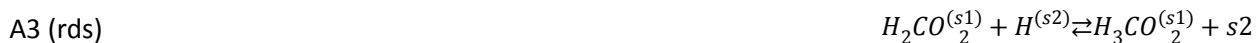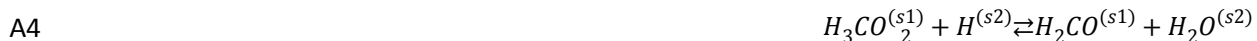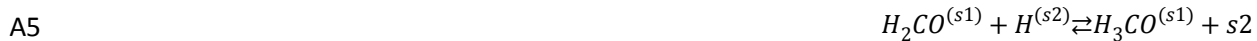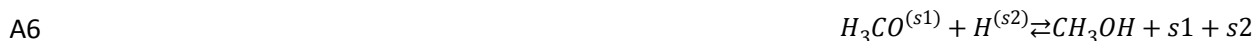

#### rWGS

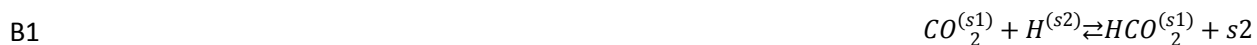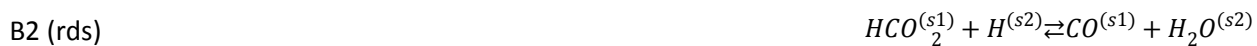

#### CO-hydrogenation

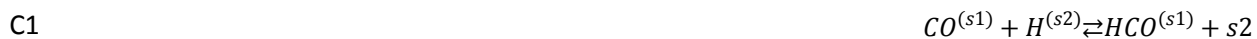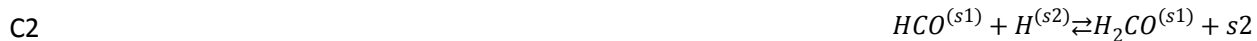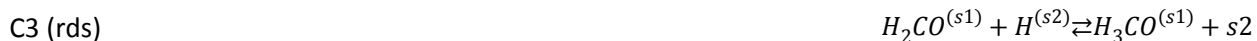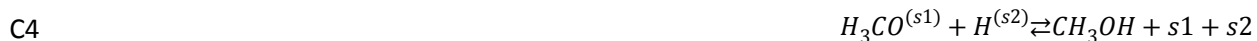

### Rate equations:

$$r_{CO_2} = \frac{k_1 \cdot K_2 \left[ f_{CO_2} \cdot f_{H_2}^{1,5} - \frac{f_{CH_3OH} \cdot f_{H_2O}}{f_{H_2}^{1,5}} \cdot \frac{1}{K_{eq,1}} \right]}{(1 + K_1 \cdot f_{CO} + K_2 \cdot f_{CO_2}) (f_{H_2}^{0,5} + K_3 \cdot f_{H_2O})}$$

$$r_{rWGS} = \frac{k_2 \cdot K_2 \left[ f_{CO_2} \cdot f_{H_2} - f_{H_2O} \cdot f_{CO} \cdot \frac{1}{K_{eq,2}} \right]}{(1 + K_1 \cdot f_{CO} + K_2 \cdot f_{CO_2}) (f_{H_2}^{0,5} + K_3 \cdot f_{H_2O})}$$

$$r_{CO} = \frac{k_3 \cdot K_1 \left[ f_{CO} \cdot f_{H_2}^{1,5} - \frac{f_{CH_3OH}}{f_{H_2}^{0,5}} \cdot \frac{1}{K_{eq,3}} \right]}{(1 + K_1 \cdot f_{CO} + K_2 \cdot f_{CO_2}) (f_{H_2}^{0,5} + K_3 \cdot f_{H_2O})}$$

### Original<sup>2</sup> and fitted kinetic parameters:

| Parameter | Graaf <sub>original</sub>                                              | Graaf <sub>fit</sub>                                                    | Unit                                                    |
|-----------|------------------------------------------------------------------------|-------------------------------------------------------------------------|---------------------------------------------------------|
| $k_1$     | $1.09 \cdot 10^5 \cdot \exp\left(\frac{-87,500}{R \cdot T}\right)$     | $5.861 \cdot 10^4 \cdot \exp\left(\frac{-62,403}{R \cdot T}\right)$     | $mol \cdot kg_{cat}^{-1} \cdot s^{-1} \cdot bar^{-1}$   |
| $k_2$     | $9.64 \cdot 10^{11} \cdot \exp\left(\frac{-152,900}{R \cdot T}\right)$ | $3.027 \cdot 10^{11} \cdot \exp\left(\frac{-123,083}{R \cdot T}\right)$ | $mol \cdot kg_{cat}^{-1} \cdot s^{-1} \cdot bar^{-0,5}$ |
| $k_3$     | $4.89 \cdot 10^7 \cdot \exp\left(\frac{-113,000}{R \cdot T}\right)$    | $-1.459 \cdot 10^8 \cdot \exp\left(\frac{-159,919}{R \cdot T}\right)$   | $mol \cdot kg_{cat}^{-1} \cdot s^{-1} \cdot bar^{-1}$   |
| $K_1$     | $2.16 \cdot 10^{-5} \cdot \exp\left(\frac{46,800}{R \cdot T}\right)$   | $6.830 \cdot 10^{-5} \cdot \exp\left(\frac{37,420}{R \cdot T}\right)$   | $bar^{-1}$                                              |
| $K_2$     | $7.05 \cdot 10^{-7} \cdot \exp\left(\frac{61,700}{R \cdot T}\right)$   | $8.014 \cdot 10^{-8} \cdot \exp\left(\frac{68,624}{R \cdot T}\right)$   | $bar^{-1}$                                              |
| $K_3$     | $6.37 \cdot 10^{-9} \cdot \exp\left(\frac{84,000}{R \cdot T}\right)$   | $1.181 \cdot 10^{-8} \cdot \exp\left(\frac{105,009}{R \cdot T}\right)$  | $bar^{-0,5}$                                            |

## Kinetic model by Bussche<sup>3</sup>

### Mechanism:

#### Adsorption

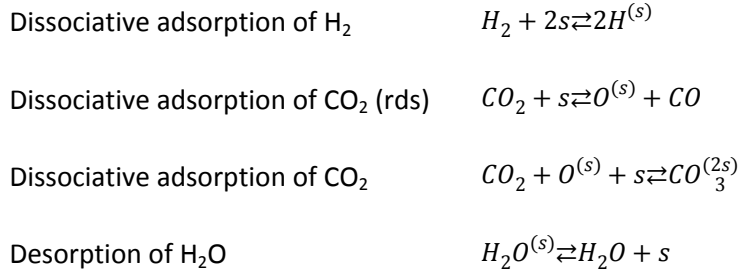

#### CO<sub>2</sub>-Hydrogenation

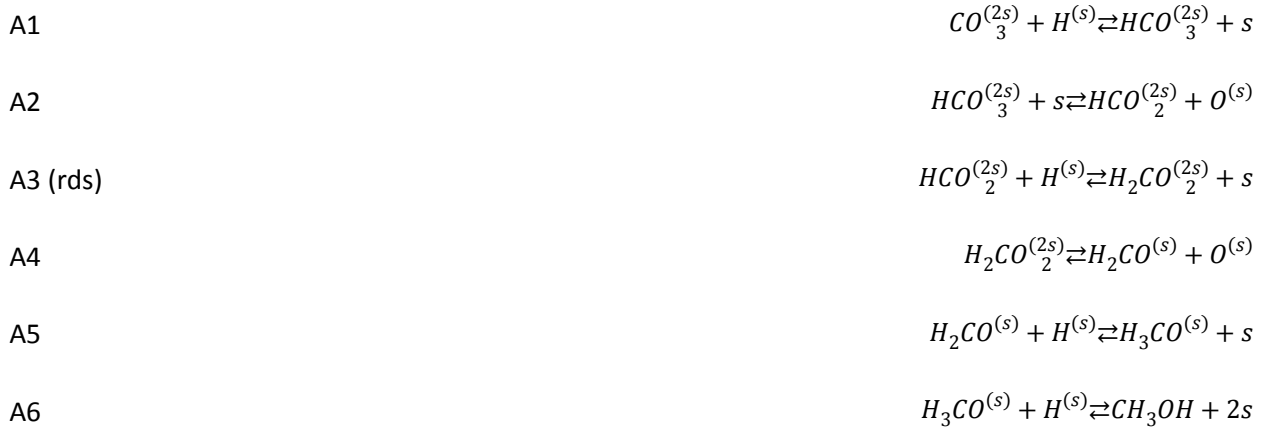

#### rWGS

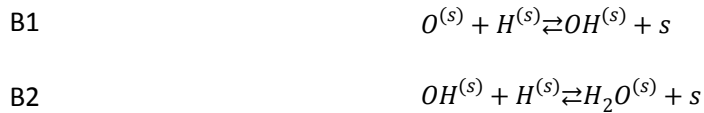

### Rate equations:

$$r_{CO_2} = \frac{k_{1,B} \cdot f_{CO_2} \cdot f_{H_2} \cdot \left[ 1 - \frac{f_{CH_3OH} \cdot f_{H_2O}}{f_{H_2}^3 \cdot f_{CO_2}} \cdot \frac{1}{K_{eq,1}} \right]}{\left( 1 + K_{1,B} \cdot \left( \frac{f_{H_2O}}{f_{H_2}} \right) + K_{2,B} \cdot f_{H_2}^{0,5} + K_{3,B} \cdot f_{H_2O} \right)^3}$$

$$r_{rWGS} = \frac{k_{2,B} \cdot f_{CO_2} \cdot \left[ 1 - \frac{f_{CO} \cdot f_{H_2O}}{f_{CO_2} \cdot f_{H_2}} \cdot \frac{1}{K_{eq,2}} \right]}{\left( 1 + K_{1,B} \left( \frac{f_{H_2O}}{f_{H_2}} \right) + K_{2,B} \cdot f_{H_2}^{0,5} + K_{3,B} \cdot f_{H_2O} \right)}$$

### Original<sup>3</sup> and fitted parameters:

| Parameter | Bussche <sub>original</sub>                                            | Bussche <sub>fit</sub>                                                 | Unit                                                  |
|-----------|------------------------------------------------------------------------|------------------------------------------------------------------------|-------------------------------------------------------|
| $k_{1,B}$ | $1.07 \cdot \exp\left(\frac{36,696}{R \cdot T}\right)$                 | $0.020 \cdot \exp\left(\frac{-29,122}{R \cdot T}\right)$               | $mol \cdot kg_{cat}^{-1} \cdot s^{-1} \cdot bar^{-2}$ |
| $k_{2,B}$ | $1.22 \cdot 10^{10} \cdot \exp\left(\frac{-94,765}{R \cdot T}\right)$  | $1.989 \cdot 10^9 \cdot \exp\left(\frac{-119,461}{R \cdot T}\right)$   | $mol \cdot kg_{cat}^{-1} \cdot s^{-1} \cdot bar^{-1}$ |
| $K_{1,B}$ | 3,453.38                                                               | $0.337 \cdot \exp\left(\frac{-2}{R \cdot T}\right)$                    | -                                                     |
| $K_{2,B}$ | $0.499 \cdot \exp\left(\frac{17,197}{R \cdot T}\right)$                | $-1.438 \cdot 10^{-3} \cdot \exp\left(\frac{17,263}{R \cdot T}\right)$ | $bar^{-0,5}$                                          |
| $K_{3,B}$ | $6.62 \cdot 10^{-11} \cdot \exp\left(\frac{124,119}{R \cdot T}\right)$ | $1.972 \cdot 10^{-10} \cdot \exp\left(\frac{90,516}{R \cdot T}\right)$ | $bar^{-1}$                                            |

## Kinetic model by Nestler<sup>4</sup>

### Mechanism<sup>5</sup>:

Adsorption (see Graaf's model)

CO<sub>2</sub>-hydrogenation (see Graaf's model)

rWGS (see Graaf's model)

### Rate equations:

$$r_{CO_2} = \frac{k_1 \cdot K_2 \cdot f_{CO_2} \cdot f_{H_2}^{1,5} \cdot \left[ 1 - \frac{f_{CH_3OH} \cdot f_{H_2O}}{f_{H_2}^3 \cdot f_{CO_2}} \cdot \frac{1}{K_{eq,1}} \right]}{(1 + K_1 \cdot f_{CO} + K_2 \cdot f_{CO_2}) (f_{H_2}^{0,5} + K_3 \cdot f_{H_2O})}$$

$$r_{rWGS} = \frac{k_2 \cdot K_2 \cdot f_{CO_2} \cdot f_{H_2} \cdot \left[ 1 - \frac{f_{CO} \cdot f_{H_2O}}{f_{CO_2} \cdot f_{H_2}} \cdot \frac{1}{K_{eq,2}} \right]}{(1 + K_1 \cdot f_{CO} + K_2 \cdot f_{CO_2}) (f_{H_2}^{0,5} + K_3 \cdot f_{H_2O})}$$

### Original<sup>4</sup> and fitted parameters:

| Parameter | Nestler <sub>original</sub>                                             | Nestler <sub>fit</sub>                                                  | Unit                                                   |
|-----------|-------------------------------------------------------------------------|-------------------------------------------------------------------------|--------------------------------------------------------|
| $k_1$     | $5.411 \cdot 10^{-4} \cdot \exp\left(\frac{-45,458}{R \cdot T}\right)$  | $2.385 \cdot 10^{-5} \cdot \exp\left(\frac{-14,709}{R \cdot T}\right)$  | $mol \cdot kg_{cat}^{-1} \cdot s^{-1} \cdot Pa^{-1}$   |
| $k_2$     | $24.701 \cdot \exp\left(\frac{-54,970}{R \cdot T}\right)$               | $244.433 \cdot \exp\left(\frac{-53,741}{R \cdot T}\right)$              | $mol \cdot kg_{cat}^{-1} \cdot s^{-1} \cdot Pa^{-0,5}$ |
| $K_1$     | $3.321 \cdot 10^{-18} \cdot \exp\left(\frac{109,959}{R \cdot T}\right)$ | $1.440 \cdot 10^{-17} \cdot \exp\left(\frac{-570}{R \cdot T}\right)$    | $Pa^{-1}$                                              |
| $K_2$     | $8.262 \cdot 10^{-6}$                                                   | $4.223 \cdot 10^{-6}$                                                   | $Pa^{-1}$                                              |
| $K_3$     | $6.430 \cdot 10^{-14} \cdot \exp\left(\frac{119,570}{R \cdot T}\right)$ | $6.407 \cdot 10^{-13} \cdot \exp\left(\frac{126,843}{R \cdot T}\right)$ | $Pa^{-0,5}$                                            |

## Miniplant experimental data

| Point No | Feed composition |     |                    | Reactor conditions |       |       | Product composition |                  |                   |                  | Hot spot             |                      |
|----------|------------------|-----|--------------------|--------------------|-------|-------|---------------------|------------------|-------------------|------------------|----------------------|----------------------|
|          | COR              | SN  | GHSV               | Ti01               | Ti02  | p     | Y <sub>CO</sub>     | Y <sub>CO2</sub> | Y <sub>MeOH</sub> | Y <sub>H2O</sub> | T <sub>Hotspot</sub> | X <sub>Hotspot</sub> |
| [-]      | [-]              | [-] | [h <sup>-1</sup> ] | [°C]               | [°C]  | [bar] | [mol-%]             | [mol-%]          | [mol-%]           | [mol-%]          | [°C]                 | [m]                  |
| 1        | 0.9              | 8   | 12,105             | 240.8              | 242.3 | 50    | 1.27%               | 5.73%            | 3.90%             | 4.36%            | 251.8                | 0.057                |
| 2        | 0.9              | 7   | 12,105             | 240.9              | 242.3 | 50    | 1.43%               | 6.74%            | 3.96%             | 4.44%            | 251.9                | 0.060                |
| 3        | 0.9              | 7   | 9,079              | 241.0              | 242.3 | 50    | 1.22%               | 6.54%            | 4.50%             | 4.78%            | 252.6                | 0.060                |
| 4        | 0.9              | 6   | 12,105             | 240.8              | 242.2 | 50    | 1.63%               | 7.98%            | 4.01%             | 4.59%            | 251.9                | 0.057                |
| 5        | 0.9              | 6   | 9,079              | 240.9              | 242.2 | 50    | 1.41%               | 7.86%            | 4.60%             | 4.94%            | 252.7                | 0.057                |
| 6        | 0.9              | 5   | 12,105             | 240.8              | 242.2 | 50    | 1.89%               | 9.69%            | 4.06%             | 4.68%            | 252.0                | 0.060                |
| 7        | 0.9              | 5   | 9,079              | 241.0              | 242.2 | 50    | 1.64%               | 9.52%            | 4.69%             | 5.03%            | 252.7                | 0.057                |
| 8        | 0.9              | 5   | 6,053              | 241.1              | 242.2 | 50    | 1.38%               | 9.32%            | 5.47%             | 5.53%            | 254.2                | 0.055                |
| 9        | 0.9              | 4   | 12,105             | 240.9              | 242.2 | 50    | 2.22%               | 11.94%           | 4.07%             | 4.76%            | 252.1                | 0.060                |
| 10       | 0.9              | 4   | 9,079              | 241.0              | 242.2 | 50    | 1.95%               | 11.98%           | 4.75%             | 5.14%            | 252.8                | 0.057                |
| 11       | 0.9              | 4   | 6,053              | 241.0              | 242.2 | 50    | 1.64%               | 11.81%           | 5.61%             | 5.65%            | 254.0                | 0.055                |
| 12       | 0.9              | 3   | 12,105             | 240.9              | 242.2 | 50    | 2.71%               | 15.42%           | 4.04%             | 4.81%            | 252.0                | 0.060                |
| 13       | 0.9              | 3   | 9,079              | 240.9              | 242.2 | 50    | 2.38%               | 15.38%           | 4.73%             | 5.15%            | 252.5                | 0.057                |
| 14       | 0.9              | 3   | 6,053              | 241.0              | 242.2 | 50    | 2.00%               | 15.25%           | 5.68%             | 5.71%            | 253.6                | 0.055                |
| 15       | 0.9              | 2   | 12,105             | 240.9              | 242.2 | 50    | 3.39%               | 20.35%           | 3.90%             | 4.75%            | 251.7                | 0.060                |
| 16       | 0.9              | 2   | 9,079              | 241.0              | 242.2 | 50    | 3.04%               | 20.58%           | 4.61%             | 5.08%            | 252.4                | 0.060                |
| 17       | 0.8              | 8   | 12,105             | 241.1              | 242.2 | 50    | 1.40%               | 5.39%            | 4.33%             | 3.79%            | 252.5                | 0.094                |
| 18       | 0.8              | 8   | 6,053              | 241.1              | 242.2 | 50    | 1.00%               | 5.00%            | 5.45%             | 4.47%            | 256.9                | 0.088                |
| 19       | 0.8              | 7   | 12,105             | 241.0              | 242.2 | 50    | 1.61%               | 6.33%            | 4.46%             | 3.87%            | 252.6                | 0.088                |
| 20       | 0.8              | 7   | 9,079              | 241.1              | 242.2 | 50    | 1.34%               | 6.23%            | 5.08%             | 4.22%            | 254.5                | 0.060                |
| 21       | 0.8              | 7   | 6,053              | 241.2              | 242.2 | 50    | 1.12%               | 5.86%            | 5.71%             | 4.57%            | 257.4                | 0.091                |
| 22       | 0.8              | 6   | 12,105             | 241.0              | 242.2 | 50    | 1.87%               | 7.51%            | 4.57%             | 3.92%            | 252.7                | 0.094                |
| 23       | 0.8              | 6   | 9,079              | 241.1              | 242.2 | 50    | 1.57%               | 7.41%            | 5.27%             | 4.29%            | 254.7                | 0.060                |
| 24       | 0.8              | 5   | 12,105             | 241.1              | 242.2 | 50    | 2.20%               | 9.02%            | 4.68%             | 3.96%            | 252.9                | 0.088                |
| 25       | 0.8              | 5   | 9,079              | 241.1              | 242.2 | 50    | 1.85%               | 9.00%            | 5.45%             | 4.36%            | 254.9                | 0.088                |
| 26       | 0.8              | 5   | 6,053              | 241.2              | 242.2 | 50    | 1.52%               | 8.77%            | 6.29%             | 4.82%            | 257.9                | 0.094                |
| 27       | 0.8              | 4   | 12,105             | 240.8              | 242.2 | 50    | 2.71%               | 11.39%           | 4.75%             | 3.98%            | 252.7                | 0.088                |
| 28       | 0.8              | 4   | 9,079              | 241.1              | 242.2 | 50    | 2.27%               | 11.35%           | 5.61%             | 4.35%            | 254.9                | 0.088                |
| 29       | 0.8              | 4   | 6,053              | 241.2              | 242.2 | 50    | 1.85%               | 11.19%           | 6.60%             | 4.87%            | 258.1                | 0.101                |
| 30       | 0.8              | 3   | 12,105             | 240.9              | 242.2 | 50    | 3.44%               | 14.58%           | 4.79%             | 3.93%            | 252.8                | 0.088                |
| 31       | 0.8              | 3   | 6,053              | 241.1              | 242.2 | 50    | 2.33%               | 14.49%           | 6.86%             | 4.83%            | 258.2                | 0.101                |
| 32       | 0.8              | 2   | 12,105             | 241.0              | 242.2 | 50    | 4.60%               | 19.59%           | 4.72%             | 3.72%            | 252.7                | 0.101                |
| 33       | 0.8              | 2   | 9,079              | 241.1              | 242.2 | 50    | 3.92%               | 19.87%           | 5.73%             | 4.07%            | 254.6                | 0.101                |
| 34       | 0.8              | 2   | 6,053              | 241.2              | 242.2 | 50    | 3.15%               | 20.01%           | 7.03%             | 4.53%            | 258.1                | 0.101                |
| 35       | 0.7              | 8   | 12,105             | 240.9              | 242.2 | 50    | 1.52%               | 4.94%            | 4.90%             | 3.30%            | 254.9                | 0.187                |
| 36       | 0.7              | 8   | 6,053              | 241.0              | 242.2 | 50    | 1.14%               | 3.98%            | 5.59%             | 3.35%            | 260.1                | 0.125                |
| 37       | 0.7              | 7   | 12,105             | 241.2              | 242.2 | 50    | 1.07%               | 4.65%            | 6.04%             | 3.91%            | 263.4                | 0.101                |

|    |      |   |        |       |       |    |       |        |       |       |       |       |
|----|------|---|--------|-------|-------|----|-------|--------|-------|-------|-------|-------|
| 38 | 0.7  | 7 | 6,053  | 241.1 | 242.2 | 50 | 1.21% | 5.46%  | 6.40% | 4.00% | 255.5 | 0.190 |
| 39 | 0.7  | 6 | 12,105 | 241.2 | 242.2 | 50 | 2.07% | 6.90%  | 5.33% | 3.42% | 255.6 | 0.190 |
| 40 | 0.7  | 6 | 9,079  | 240.9 | 242.2 | 50 | 1.70% | 6.80%  | 6.11% | 3.73% | 259.6 | 0.125 |
| 41 | 0.7  | 6 | 6,053  | 241.2 | 242.2 | 50 | 1.41% | 6.59%  | 6.80% | 4.12% | 264.8 | 0.101 |
| 42 | 0.7  | 5 | 12,105 | 241.2 | 242.2 | 50 | 2.52% | 8.39%  | 5.54% | 3.41% | 255.8 | 0.187 |
| 43 | 0.7  | 5 | 9,079  | 240.9 | 242.2 | 50 | 2.06% | 8.35%  | 6.41% | 3.75% | 260.0 | 0.125 |
| 44 | 0.7  | 4 | 9,079  | 241.0 | 242.2 | 50 | 2.57% | 10.52% | 6.76% | 3.71% | 260.9 | 0.190 |
| 45 | 0.7  | 3 | 12,105 | 241.2 | 242.2 | 50 | 4.20% | 13.63% | 5.94% | 3.23% | 256.1 | 0.190 |
| 46 | 0.7  | 3 | 9,079  | 241.0 | 242.2 | 50 | 3.05% | 12.22% | 7.16% | 3.56% | 262.5 | 0.187 |
| 47 | 0.7  | 3 | 6,053  | 241.1 | 242.2 | 50 | 2.68% | 13.80% | 8.36% | 3.94% | 268.3 | 0.122 |
| 48 | 0.7  | 2 | 12,105 | 241.2 | 242.2 | 50 | 5.91% | 18.52% | 6.03% | 2.95% | 255.7 | 0.190 |
| 49 | 0.7  | 2 | 9,079  | 240.8 | 242.2 | 50 | 4.85% | 18.93% | 7.47% | 3.25% | 261.5 | 0.190 |
| 50 | 0.7  | 2 | 6,053  | 241.1 | 242.2 | 50 | 3.82% | 19.24% | 8.89% | 3.53% | 269.0 | 0.122 |
| 51 | 0.95 | 8 | 12,105 | 241.2 | 242.2 | 50 | 1.21% | 5.99%  | 3.70% | 4.63% | 251.6 | 0.057 |
| 52 | 0.95 | 8 | 9,079  | 240.8 | 242.2 | 50 | 1.06% | 5.78%  | 4.16% | 4.93% | 252.0 | 0.052 |
| 53 | 0.95 | 8 | 6,053  | 240.9 | 242.2 | 50 | 0.91% | 5.52%  | 4.69% | 5.33% | 252.3 | 0.052 |
| 54 | 0.95 | 7 | 12,105 | 240.8 | 242.2 | 50 | 1.34% | 6.91%  | 3.71% | 4.77% | 251.5 | 0.057 |
| 55 | 0.95 | 7 | 9,079  | 241.0 | 242.2 | 50 | 1.16% | 6.69%  | 4.22% | 5.08% | 252.2 | 0.052 |
| 56 | 0.95 | 6 | 12,105 | 240.8 | 242.2 | 50 | 1.52% | 8.20%  | 3.76% | 4.92% | 251.5 | 0.057 |
| 57 | 0.95 | 6 | 9,079  | 241.0 | 242.2 | 50 | 1.33% | 8.06%  | 4.30% | 5.27% | 252.1 | 0.052 |
| 58 | 0.95 | 5 | 12,105 | 240.7 | 242.2 | 50 | 1.76% | 9.96%  | 3.78% | 5.07% | 251.7 | 0.060 |
| 59 | 0.95 | 5 | 9,079  | 240.9 | 242.2 | 50 | 1.54% | 9.89%  | 4.35% | 5.43% | 252.2 | 0.052 |
| 60 | 0.95 | 5 | 6,053  | 240.7 | 242.2 | 50 | 1.32% | 9.60%  | 5.09% | 5.90% | 252.3 | 0.052 |
| 61 | 0.95 | 4 | 12,105 | 240.9 | 242.2 | 50 | 2.03% | 12.25% | 3.76% | 5.17% | 251.7 | 0.057 |
| 62 | 0.95 | 4 | 9,079  | 240.9 | 242.2 | 50 | 1.81% | 12.15% | 4.37% | 5.56% | 252.0 | 0.052 |
| 63 | 0.95 | 4 | 6,053  | 240.8 | 242.2 | 50 | 1.55% | 12.03% | 5.17% | 6.08% | 252.2 | 0.052 |
| 64 | 0.95 | 3 | 12,105 | 240.8 | 242.2 | 50 | 2.39% | 15.73% | 3.70% | 5.29% | 251.5 | 0.057 |
| 65 | 0.95 | 3 | 9,079  | 240.9 | 242.2 | 50 | 2.16% | 15.60% | 4.30% | 5.64% | 252.0 | 0.052 |
| 66 | 0.95 | 3 | 6,053  | 240.7 | 242.2 | 50 | 1.85% | 15.54% | 5.16% | 6.17% | 252.1 | 0.052 |
| 67 | 0.95 | 2 | 12,105 | 240.9 | 242.2 | 50 | 2.89% | 20.70% | 3.56% | 5.34% | 251.2 | 0.057 |
| 68 | 0.95 | 2 | 9,079  | 240.9 | 242.2 | 50 | 2.66% | 20.84% | 4.15% | 5.71% | 251.6 | 0.052 |
| 69 | 0.9  | 8 | 12,105 | 241.6 | 242.2 | 65 | 0.81% | 4.99%  | 5.58% | 5.55% | 257.7 | 0.052 |
| 70 | 0.9  | 8 | 9,079  | 241.7 | 242.4 | 65 | 0.80% | 4.93%  | 5.55% | 5.58% | 257.8 | 0.052 |
| 71 | 0.9  | 7 | 12,105 | 241.5 | 242.3 | 65 | 1.10% | 6.25%  | 5.06% | 5.28% | 255.9 | 0.055 |
| 72 | 0.9  | 7 | 9,079  | 241.4 | 242.3 | 65 | 0.91% | 5.91%  | 5.72% | 5.74% | 257.7 | 0.052 |
| 73 | 0.9  | 7 | 6,053  | 241.7 | 242.2 | 65 | 0.77% | 5.67%  | 6.33% | 5.85% | 259.6 | 0.052 |
| 74 | 0.9  | 6 | 12,105 | 241.3 | 242.3 | 65 | 1.27% | 7.42%  | 5.14% | 5.42% | 255.8 | 0.055 |
| 75 | 0.9  | 6 | 9,079  | 241.5 | 242.2 | 65 | 1.06% | 7.19%  | 5.89% | 5.91% | 257.8 | 0.052 |
| 76 | 0.9  | 6 | 6,053  | 241.7 | 242.3 | 65 | 0.88% | 6.92%  | 6.60% | 6.09% | 259.7 | 0.052 |
| 77 | 0.9  | 5 | 12,105 | 241.3 | 242.2 | 65 | 1.50% | 9.11%  | 5.21% | 5.53% | 256.0 | 0.052 |
| 78 | 0.9  | 5 | 9,079  | 241.5 | 242.2 | 65 | 1.26% | 8.91%  | 6.04% | 6.10% | 257.9 | 0.055 |
| 79 | 0.9  | 5 | 6,053  | 241.6 | 242.2 | 65 | 1.03% | 8.62%  | 6.91% | 6.38% | 259.7 | 0.052 |

|     |      |   |        |       |       |    |       |        |        |       |       |       |
|-----|------|---|--------|-------|-------|----|-------|--------|--------|-------|-------|-------|
| 80  | 0.9  | 4 | 12,105 | 241.3 | 242.2 | 65 | 1.79% | 11.49% | 5.24%  | 5.60% | 256.0 | 0.052 |
| 81  | 0.9  | 4 | 6,053  | 241.5 | 242.2 | 65 | 1.25% | 11.14% | 7.10%  | 6.35% | 259.6 | 0.052 |
| 82  | 0.9  | 3 | 12,105 | 241.4 | 242.2 | 65 | 2.24% | 15.12% | 5.21%  | 5.62% | 256.0 | 0.055 |
| 83  | 0.9  | 3 | 9,079  | 241.4 | 242.2 | 65 | 1.90% | 15.02% | 6.16%  | 6.17% | 257.6 | 0.055 |
| 84  | 0.9  | 3 | 6,053  | 241.6 | 242.2 | 65 | 1.53% | 14.49% | 7.43%  | 6.92% | 259.2 | 0.052 |
| 85  | 0.9  | 2 | 12,105 | 241.2 | 242.2 | 65 | 2.87% | 20.22% | 5.06%  | 5.50% | 255.4 | 0.055 |
| 86  | 0.9  | 2 | 9,079  | 241.4 | 242.2 | 65 | 2.46% | 20.35% | 6.03%  | 6.00% | 257.2 | 0.052 |
| 87  | 0.8  | 8 | 12,105 | 241.3 | 242.2 | 65 | 1.01% | 4.82%  | 5.50%  | 4.65% | 257.1 | 0.055 |
| 88  | 0.8  | 8 | 6,053  | 241.6 | 242.2 | 65 | 0.71% | 4.30%  | 6.64%  | 5.41% | 264.7 | 0.099 |
| 89  | 0.8  | 7 | 12,105 | 241.3 | 242.2 | 65 | 1.16% | 5.73%  | 5.71%  | 4.73% | 257.3 | 0.125 |
| 90  | 0.8  | 7 | 9,079  | 241.5 | 242.2 | 65 | 0.95% | 5.47%  | 6.40%  | 5.19% | 260.9 | 0.125 |
| 91  | 0.8  | 7 | 6,053  | 241.6 | 242.2 | 65 | 0.80% | 5.20%  | 6.96%  | 5.40% | 265.9 | 0.099 |
| 92  | 0.8  | 6 | 12,105 | 241.2 | 242.2 | 65 | 1.38% | 6.97%  | 5.92%  | 4.80% | 257.5 | 0.127 |
| 93  | 0.8  | 6 | 9,079  | 241.5 | 242.2 | 65 | 1.12% | 6.71%  | 6.68%  | 5.31% | 261.1 | 0.125 |
| 94  | 0.8  | 5 | 9,079  | 241.4 | 242.2 | 65 | 1.34% | 8.32%  | 6.97%  | 5.37% | 261.2 | 0.125 |
| 95  | 0.8  | 4 | 12,105 | 241.3 | 242.2 | 65 | 2.04% | 10.99% | 6.23%  | 4.90% | 257.7 | 0.091 |
| 96  | 0.8  | 4 | 9,079  | 241.4 | 242.2 | 65 | 1.66% | 10.79% | 7.26%  | 5.45% | 261.3 | 0.125 |
| 97  | 0.8  | 4 | 6,053  | 241.8 | 242.2 | 65 | 1.34% | 10.54% | 8.24%  | 5.67% | 267.3 | 0.122 |
| 98  | 0.8  | 3 | 12,105 | 241.2 | 242.2 | 65 | 2.65% | 14.19% | 6.35%  | 4.78% | 257.7 | 0.091 |
| 99  | 0.8  | 3 | 6,053  | 241.7 | 242.2 | 65 | 1.70% | 14.02% | 8.63%  | 5.57% | 268.4 | 0.122 |
| 100 | 0.8  | 2 | 12,105 | 241.1 | 242.2 | 65 | 3.62% | 19.59% | 6.37%  | 4.56% | 257.3 | 0.091 |
| 101 | 0.8  | 2 | 9,079  | 241.3 | 242.2 | 65 | 2.92% | 19.73% | 7.68%  | 4.97% | 260.8 | 0.125 |
| 102 | 0.8  | 2 | 6,053  | 241.6 | 242.2 | 65 | 2.30% | 19.78% | 9.03%  | 5.48% | 268.4 | 0.125 |
| 103 | 0.7  | 8 | 12,105 | 241.2 | 242.2 | 65 | 1.02% | 4.34%  | 6.22%  | 4.22% | 262.1 | 0.125 |
| 104 | 0.7  | 8 | 9,079  | 241.4 | 242.2 | 65 | 0.84% | 4.12%  | 6.78%  | 4.50% | 268.6 | 0.125 |
| 105 | 0.7  | 8 | 6,053  | 241.7 | 242.2 | 65 | 0.73% | 3.95%  | 7.21%  | 4.80% | 272.8 | 0.099 |
| 106 | 0.7  | 7 | 12,105 | 241.0 | 242.2 | 65 | 1.19% | 5.21%  | 6.54%  | 4.25% | 262.9 | 0.127 |
| 107 | 0.7  | 7 | 6,053  | 241.5 | 242.2 | 65 | 0.84% | 4.78%  | 7.74%  | 4.85% | 274.4 | 0.099 |
| 108 | 0.7  | 6 | 12,105 | 241.1 | 242.2 | 65 | 1.41% | 6.38%  | 6.87%  | 4.33% | 263.5 | 0.187 |
| 109 | 0.7  | 6 | 9,079  | 241.4 | 242.2 | 65 | 1.16% | 6.11%  | 7.65%  | 4.67% | 270.9 | 0.125 |
| 110 | 0.7  | 6 | 6,053  | 241.7 | 242.2 | 65 | 0.98% | 5.88%  | 8.25%  | 5.00% | 276.0 | 0.099 |
| 111 | 0.7  | 5 | 12,105 | 241.2 | 242.2 | 65 | 1.71% | 7.85%  | 7.27%  | 4.30% | 264.0 | 0.195 |
| 112 | 0.7  | 5 | 9,079  | 241.4 | 242.2 | 65 | 1.41% | 7.71%  | 8.14%  | 4.69% | 271.6 | 0.125 |
| 113 | 0.7  | 5 | 6,053  | 241.7 | 242.2 | 65 | 1.16% | 7.49%  | 8.86%  | 5.15% | 277.4 | 0.099 |
| 114 | 0.7  | 4 | 9,079  | 241.4 | 242.2 | 65 | 1.75% | 10.00% | 8.70%  | 4.79% | 272.4 | 0.125 |
| 115 | 0.7  | 3 | 12,105 | 241.3 | 242.2 | 65 | 2.89% | 13.46% | 8.14%  | 4.10% | 266.2 | 0.195 |
| 116 | 0.7  | 3 | 9,079  | 241.6 | 242.2 | 65 | 2.31% | 13.35% | 9.31%  | 4.60% | 273.9 | 0.125 |
| 117 | 0.7  | 3 | 6,053  | 241.9 | 242.2 | 65 | 1.87% | 13.21% | 10.29% | 4.97% | 281.0 | 0.101 |
| 118 | 0.7  | 2 | 12,105 | 241.3 | 242.2 | 65 | 4.18% | 18.74% | 8.57%  | 3.78% | 266.3 | 0.195 |
| 119 | 0.7  | 2 | 9,079  | 241.8 | 242.2 | 65 | 3.32% | 18.95% | 9.93%  | 4.18% | 274.2 | 0.127 |
| 120 | 0.7  | 2 | 6,053  | 241.9 | 242.2 | 65 | 2.68% | 19.12% | 11.07% | 4.54% | 282.6 | 0.125 |
| 121 | 0.95 | 8 | 12,105 | 240.7 | 242.2 | 65 | 0.94% | 5.44%  | 4.66%  | 5.36% | 254.5 | 0.052 |



|     |      |   |        |       |       |    |       |        |       |       |       |       |
|-----|------|---|--------|-------|-------|----|-------|--------|-------|-------|-------|-------|
| 122 | 0.95 | 8 | 9,079  | 240.9 | 242.2 | 65 | 0.80% | 5.17%  | 5.23% | 5.79% | 255.8 | 0.052 |
| 123 | 0.95 | 8 | 6,053  | 241.0 | 242.2 | 65 | 0.68% | 4.91%  | 5.81% | 5.98% | 256.6 | 0.049 |
| 124 | 0.95 | 7 | 12,105 | 240.6 | 242.2 | 65 | 1.08% | 6.43%  | 4.69% | 5.54% | 254.3 | 0.055 |
| 125 | 0.95 | 7 | 9,079  | 240.9 | 242.2 | 65 | 0.91% | 6.19%  | 5.34% | 5.96% | 255.8 | 0.052 |
| 126 | 0.95 | 7 | 6,053  | 241.0 | 242.2 | 65 | 0.77% | 5.90%  | 6.00% | 6.13% | 256.5 | 0.049 |
| 127 | 0.95 | 6 | 9,079  | 240.8 | 242.2 | 65 | 1.08% | 7.58%  | 5.48% | 6.17% | 255.7 | 0.052 |
| 128 | 0.95 | 5 | 12,105 | 240.7 | 242.2 | 65 | 1.45% | 9.56%  | 4.78% | 5.82% | 254.8 | 0.052 |
| 129 | 0.95 | 5 | 9,079  | 240.9 | 242.2 | 65 | 1.23% | 9.20%  | 5.54% | 6.37% | 256.0 | 0.052 |
| 130 | 0.95 | 5 | 6,053  | 241.0 | 242.2 | 65 | 1.02% | 8.85%  | 6.43% | 6.68% | 256.5 | 0.049 |
| 131 | 0.95 | 4 | 12,105 | 240.7 | 242.2 | 65 | 1.71% | 11.86% | 4.76% | 5.93% | 254.7 | 0.052 |
| 132 | 0.95 | 4 | 6,053  | 241.0 | 242.2 | 65 | 1.22% | 11.43% | 6.57% | 6.91% | 256.4 | 0.049 |
| 133 | 0.95 | 3 | 12,105 | 240.6 | 242.2 | 65 | 2.07% | 15.35% | 4.69% | 6.01% | 254.4 | 0.055 |
| 134 | 0.95 | 3 | 9,079  | 240.7 | 242.2 | 65 | 1.80% | 15.20% | 5.50% | 6.46% | 255.6 | 0.052 |
| 135 | 0.95 | 3 | 6,053  | 241.0 | 242.2 | 65 | 1.49% | 15.12% | 6.58% | 6.89% | 256.0 | 0.049 |
| 136 | 0.95 | 2 | 12,105 | 240.6 | 242.2 | 65 | 2.57% | 20.52% | 4.49% | 6.03% | 254.1 | 0.055 |
| 137 | 0.95 | 2 | 9,079  | 240.9 | 242.2 | 65 | 2.25% | 20.46% | 5.30% | 6.53% | 255.0 | 0.052 |
| 138 | 0.9  | 8 | 12,105 | 240.8 | 242.2 | 80 | 0.75% | 4.76%  | 5.91% | 5.90% | 258.9 | 0.055 |
| 139 | 0.9  | 8 | 9,079  | 240.9 | 242.2 | 80 | 0.63% | 4.41%  | 6.55% | 6.32% | 261.1 | 0.094 |
| 140 | 0.9  | 8 | 6,053  | 240.8 | 242.2 | 80 | 0.53% | 4.12%  | 7.00% | 6.25% | 264.8 | 0.094 |
| 141 | 0.9  | 7 | 12,105 | 240.8 | 242.2 | 80 | 0.87% | 5.65%  | 6.05% | 6.09% | 258.8 | 0.055 |
| 142 | 0.9  | 7 | 9,079  | 240.9 | 242.2 | 80 | 0.72% | 5.33%  | 6.83% | 6.72% | 261.0 | 0.055 |
| 143 | 0.9  | 7 | 6,053  | 240.7 | 242.2 | 80 | 0.61% | 4.94%  | 7.54% | 6.94% | 264.7 | 0.094 |
| 144 | 0.9  | 6 | 12,105 | 240.9 | 242.2 | 80 | 1.02% | 7.01%  | 6.18% | 6.25% | 259.0 | 0.055 |
| 145 | 0.9  | 6 | 9,079  | 240.9 | 242.2 | 80 | 0.85% | 6.62%  | 6.93% | 6.49% | 261.1 | 0.055 |
| 146 | 0.9  | 6 | 6,053  | 240.8 | 242.2 | 80 | 0.70% | 6.23%  | 7.56% | 6.48% | 264.2 | 0.094 |
| 147 | 0.9  | 5 | 12,105 | 241.0 | 242.2 | 80 | 1.23% | 8.66%  | 6.23% | 6.44% | 259.1 | 0.055 |
| 148 | 0.9  | 5 | 9,079  | 241.0 | 242.2 | 80 | 1.01% | 8.22%  | 7.17% | 7.06% | 261.1 | 0.055 |
| 149 | 0.9  | 5 | 6,053  | 240.9 | 242.2 | 80 | 0.84% | 7.99%  | 7.93% | 6.58% | 264.0 | 0.094 |
| 150 | 0.9  | 4 | 12,105 | 240.8 | 242.3 | 80 | 1.50% | 11.07% | 6.27% | 6.44% | 259.1 | 0.055 |
| 151 | 0.9  | 4 | 9,079  | 241.1 | 242.3 | 80 | 1.23% | 10.80% | 7.30% | 7.03% | 261.2 | 0.055 |
| 152 | 0.9  | 4 | 6,053  | 240.9 | 242.3 | 80 | 1.01% | 10.30% | 8.53% | 7.77% | 263.8 | 0.055 |
| 153 | 0.9  | 3 | 12,105 | 240.8 | 242.3 | 80 | 1.91% | 14.50% | 6.26% | 6.37% | 259.1 | 0.055 |
| 154 | 0.9  | 3 | 9,079  | 241.0 | 242.3 | 80 | 1.56% | 14.24% | 7.37% | 6.84% | 261.1 | 0.055 |
| 155 | 0.9  | 3 | 6,053  | 240.9 | 242.2 | 80 | 1.26% | 14.01% | 8.53% | 7.32% | 263.3 | 0.055 |
| 156 | 0.9  | 2 | 12,105 | 240.7 | 242.2 | 80 | 2.49% | 19.97% | 6.04% | 6.21% | 258.6 | 0.055 |
| 157 | 0.9  | 2 | 9,079  | 240.9 | 242.2 | 80 | 2.08% | 19.96% | 7.21% | 6.82% | 260.5 | 0.055 |
| 158 | 0.9  | 2 | 6,053  | 241.0 | 242.2 | 80 | 1.67% | 19.93% | 8.56% | 7.14% | 262.0 | 0.055 |
| 159 | 0.8  | 8 | 12,105 | 241.3 | 242.2 | 80 | 0.77% | 4.30%  | 6.46% | 5.38% | 262.5 | 0.099 |
| 160 | 0.8  | 8 | 6,053  | 241.2 | 242.2 | 80 | 0.54% | 3.74%  | 7.52% | 5.77% | 273.7 | 0.094 |
| 161 | 0.8  | 7 | 12,105 | 241.4 | 242.2 | 80 | 0.89% | 5.18%  | 6.73% | 5.50% | 263.3 | 0.094 |
| 162 | 0.8  | 7 | 9,079  | 241.3 | 242.2 | 80 | 0.74% | 4.87%  | 7.48% | 5.85% | 268.5 | 0.099 |
| 163 | 0.8  | 7 | 6,053  | 241.2 | 242.2 | 80 | 0.62% | 4.60%  | 7.99% | 5.99% | 275.1 | 0.094 |

|     |      |   |        |       |       |    |       |        |        |       |       |       |
|-----|------|---|--------|-------|-------|----|-------|--------|--------|-------|-------|-------|
| 164 | 0.8  | 6 | 12,105 | 241.5 | 242.2 | 80 | 1.06% | 6.46%  | 7.02%  | 5.66% | 263.7 | 0.094 |
| 165 | 0.8  | 6 | 9,079  | 241.5 | 242.2 | 80 | 0.86% | 6.06%  | 7.85%  | 6.05% | 269.3 | 0.127 |
| 166 | 0.8  | 6 | 6,053  | 241.3 | 242.2 | 80 | 0.71% | 5.68%  | 8.51%  | 6.46% | 276.0 | 0.094 |
| 167 | 0.8  | 5 | 9,079  | 241.5 | 242.2 | 80 | 1.05% | 7.74%  | 8.22%  | 6.18% | 269.6 | 0.127 |
| 168 | 0.8  | 5 | 6,053  | 241.5 | 242.2 | 80 | 0.87% | 7.41%  | 8.95%  | 6.26% | 277.5 | 0.094 |
| 169 | 0.8  | 4 | 12,105 | 241.4 | 242.2 | 80 | 1.60% | 10.44% | 7.55%  | 5.76% | 263.8 | 0.094 |
| 170 | 0.8  | 4 | 9,079  | 241.5 | 242.2 | 80 | 1.29% | 10.10% | 8.66%  | 6.33% | 269.7 | 0.127 |
| 171 | 0.8  | 4 | 6,053  | 241.5 | 242.2 | 80 | 1.07% | 9.77%  | 9.54%  | 6.77% | 278.3 | 0.094 |
| 172 | 0.8  | 3 | 12,105 | 241.4 | 242.2 | 80 | 2.09% | 13.68% | 7.73%  | 5.61% | 263.8 | 0.094 |
| 173 | 0.8  | 3 | 6,053  | 241.5 | 242.2 | 80 | 1.35% | 13.31% | 10.42% | 7.13% | 278.8 | 0.094 |
| 174 | 0.8  | 2 | 12,105 | 241.4 | 242.2 | 80 | 2.94% | 19.30% | 7.76%  | 5.19% | 263.3 | 0.094 |
| 175 | 0.8  | 2 | 9,079  | 241.5 | 242.2 | 80 | 2.32% | 19.34% | 9.18%  | 5.85% | 268.9 | 0.127 |
| 176 | 0.8  | 2 | 6,053  | 241.5 | 242.2 | 80 | 1.83% | 19.06% | 10.92% | 7.19% | 278.6 | 0.099 |
| 177 | 0.7  | 8 | 12,105 | 241.6 | 242.2 | 80 | 0.74% | 3.81%  | 7.21%  | 4.93% | 270.9 | 0.153 |
| 178 | 0.7  | 7 | 12,105 | 241.6 | 242.2 | 80 | 0.87% | 4.65%  | 7.64%  | 4.98% | 272.8 | 0.153 |
| 179 | 0.7  | 7 | 6,053  | 241.4 | 242.2 | 80 | 0.64% | 4.12%  | 8.72%  | 5.52% | 285.3 | 0.094 |
| 180 | 0.7  | 6 | 12,105 | 241.8 | 242.2 | 80 | 1.04% | 5.77%  | 8.12%  | 5.08% | 274.4 | 0.153 |
| 181 | 0.7  | 6 | 9,079  | 241.7 | 242.2 | 80 | 0.87% | 5.52%  | 8.83%  | 5.49% | 281.7 | 0.127 |
| 182 | 0.7  | 6 | 6,053  | 241.5 | 242.2 | 80 | 0.74% | 5.19%  | 9.27%  | 5.58% | 287.1 | 0.094 |
| 183 | 0.7  | 5 | 12,105 | 241.7 | 242.2 | 80 | 1.29% | 7.31%  | 8.63%  | 5.20% | 275.7 | 0.153 |
| 184 | 0.7  | 5 | 9,079  | 241.8 | 242.2 | 80 | 1.06% | 7.07%  | 9.44%  | 5.65% | 283.6 | 0.127 |
| 185 | 0.7  | 5 | 6,053  | 241.7 | 242.2 | 80 | 0.90% | 6.72%  | 10.27% | 6.17% | 289.7 | 0.094 |
| 186 | 0.7  | 4 | 9,079  | 241.8 | 242.2 | 80 | 1.33% | 9.23%  | 10.08% | 5.67% | 285.7 | 0.127 |
| 187 | 0.7  | 3 | 12,105 | 241.7 | 242.2 | 80 | 2.18% | 12.95% | 9.81%  | 5.04% | 278.1 | 0.153 |
| 188 | 0.7  | 3 | 9,079  | 242.0 | 242.2 | 80 | 1.77% | 12.84% | 10.87% | 5.58% | 287.4 | 0.127 |
| 189 | 0.7  | 2 | 12,105 | 241.5 | 242.2 | 80 | 3.15% | 18.55% | 10.41% | 4.57% | 278.2 | 0.198 |
| 190 | 0.95 | 8 | 12,105 | 241.0 | 242.2 | 80 | 0.79% | 5.01%  | 5.39%  | 5.97% | 257.3 | 0.055 |
| 191 | 0.95 | 8 | 9,079  | 240.6 | 242.2 | 80 | 0.65% | 4.68%  | 6.09%  | 6.51% | 258.1 | 0.052 |
| 192 | 0.95 | 8 | 6,053  | 241.0 | 242.2 | 80 | 0.55% | 4.31%  | 6.77%  | 6.84% | 259.5 | 0.055 |
| 193 | 0.95 | 7 | 12,105 | 240.9 | 242.2 | 80 | 0.91% | 6.07%  | 5.46%  | 6.20% | 257.1 | 0.055 |
| 194 | 0.95 | 7 | 9,079  | 240.6 | 242.2 | 80 | 0.75% | 5.64%  | 6.21%  | 6.51% | 258.0 | 0.052 |
| 195 | 0.95 | 7 | 6,053  | 240.8 | 242.2 | 80 | 0.62% | 5.24%  | 6.87%  | 6.48% | 259.3 | 0.055 |
| 196 | 0.95 | 6 | 9,079  | 240.8 | 242.2 | 80 | 0.88% | 6.95%  | 6.38%  | 6.98% | 258.0 | 0.052 |
| 197 | 0.95 | 5 | 12,105 | 240.7 | 242.2 | 80 | 1.25% | 9.01%  | 5.56%  | 6.49% | 257.4 | 0.055 |
| 198 | 0.95 | 5 | 9,079  | 240.6 | 242.2 | 80 | 1.05% | 8.72%  | 6.45%  | 6.95% | 258.2 | 0.052 |
| 199 | 0.95 | 5 | 6,053  | 240.8 | 242.2 | 80 | 0.84% | 8.23%  | 7.49%  | 7.45% | 259.1 | 0.052 |
| 200 | 0.95 | 4 | 12,105 | 240.7 | 242.2 | 80 | 1.51% | 11.51% | 5.54%  | 6.61% | 257.3 | 0.055 |
| 201 | 0.95 | 4 | 6,053  | 240.5 | 242.2 | 80 | 1.01% | 10.72% | 7.83%  | 8.01% | 258.8 | 0.036 |
| 202 | 0.95 | 3 | 12,105 | 240.6 | 242.2 | 80 | 1.85% | 15.10% | 5.45%  | 6.72% | 257.1 | 0.055 |
| 203 | 0.95 | 3 | 9,079  | 240.5 | 242.2 | 80 | 1.57% | 14.71% | 6.42%  | 7.07% | 257.8 | 0.052 |
| 204 | 0.95 | 3 | 6,053  | 240.6 | 242.2 | 80 | 1.27% | 14.40% | 7.71%  | 7.62% | 258.3 | 0.036 |
| 205 | 0.95 | 2 | 12,105 | 240.5 | 242.2 | 80 | 2.34% | 20.18% | 5.19%  | 6.55% | 256.6 | 0.055 |

|     |      |   |        |       |       |    |       |        |       |       |       |       |
|-----|------|---|--------|-------|-------|----|-------|--------|-------|-------|-------|-------|
| 206 | 0.95 | 2 | 9,079  | 240.3 | 242.2 | 80 | 2.00% | 20.20% | 6.18% | 7.12% | 257.3 | 0.055 |
| 207 | 0.98 | 8 | 12,105 | 240.3 | 242.2 | 50 | 1.24% | 6.21%  | 3.27% | 4.63% | 250.7 | 0.055 |
| 208 | 0.98 | 8 | 9,079  | 240.2 | 242.2 | 50 | 1.10% | 6.08%  | 3.75% | 4.92% | 250.9 | 0.052 |
| 209 | 0.98 | 8 | 6,053  | 240.2 | 242.2 | 50 | 0.92% | 5.70%  | 4.33% | 5.36% | 251.5 | 0.036 |
| 210 | 0.98 | 7 | 12,105 | 240.1 | 242.2 | 50 | 1.40% | 7.20%  | 3.28% | 4.77% | 250.5 | 0.055 |
| 211 | 0.98 | 7 | 9,079  | 240.2 | 242.2 | 50 | 1.23% | 7.02%  | 3.77% | 5.10% | 250.9 | 0.052 |
| 212 | 0.98 | 7 | 6,053  | 240.3 | 242.2 | 50 | 1.03% | 6.71%  | 4.42% | 5.55% | 251.7 | 0.036 |
| 213 | 0.98 | 6 | 9,079  | 240.2 | 242.2 | 50 | 1.39% | 8.32%  | 3.80% | 5.24% | 250.8 | 0.052 |
| 214 | 0.98 | 5 | 12,105 | 240.1 | 242.2 | 50 | 1.76% | 10.19% | 3.30% | 5.08% | 250.5 | 0.055 |
| 215 | 0.98 | 5 | 9,079  | 240.2 | 242.2 | 50 | 1.58% | 10.10% | 3.83% | 5.40% | 251.0 | 0.052 |
| 216 | 0.98 | 5 | 6,053  | 240.2 | 242.2 | 50 | 1.34% | 9.88%  | 4.58% | 5.95% | 251.8 | 0.034 |
| 217 | 0.98 | 4 | 12,105 | 240.0 | 242.2 | 50 | 2.01% | 12.59% | 3.28% | 5.25% | 250.5 | 0.052 |
| 218 | 0.98 | 4 | 6,053  | 240.2 | 242.2 | 50 | 1.56% | 12.14% | 4.61% | 6.12% | 251.8 | 0.034 |
| 219 | 0.98 | 3 | 12,105 | 240.0 | 242.2 | 50 | 2.32% | 15.97% | 3.21% | 5.42% | 250.4 | 0.055 |
| 220 | 0.98 | 3 | 9,079  | 240.2 | 242.2 | 50 | 2.13% | 15.90% | 3.74% | 5.74% | 250.8 | 0.052 |
| 221 | 0.98 | 3 | 6,053  | 240.1 | 242.2 | 50 | 1.86% | 15.80% | 4.55% | 6.29% | 251.4 | 0.034 |
| 222 | 0.98 | 2 | 12,105 | 240.0 | 242.2 | 50 | 2.70% | 21.04% | 3.09% | 5.53% | 250.1 | 0.055 |
| 223 | 0.98 | 2 | 9,079  | 240.1 | 242.2 | 50 | 2.56% | 20.97% | 3.57% | 5.88% | 250.3 | 0.052 |
| 224 | 0.98 | 8 | 12,105 | 240.3 | 242.2 | 65 | 1.03% | 5.75%  | 4.14% | 5.26% | 253.3 | 0.052 |
| 225 | 0.98 | 8 | 9,079  | 240.3 | 242.2 | 65 | 0.87% | 5.51%  | 4.76% | 5.73% | 253.9 | 0.052 |
| 226 | 0.98 | 8 | 6,053  | 240.4 | 242.3 | 65 | 0.71% | 5.12%  | 5.50% | 6.33% | 254.8 | 0.036 |
| 227 | 0.98 | 7 | 12,105 | 240.3 | 242.3 | 65 | 1.15% | 6.83%  | 4.17% | 5.41% | 253.3 | 0.052 |
| 228 | 0.98 | 7 | 9,079  | 240.3 | 242.3 | 65 | 0.98% | 6.53%  | 4.83% | 5.90% | 253.9 | 0.052 |
| 229 | 0.98 | 7 | 6,053  | 240.3 | 242.2 | 65 | 0.80% | 6.15%  | 5.66% | 6.54% | 254.9 | 0.036 |
| 230 | 0.98 | 6 | 9,079  | 240.4 | 242.3 | 65 | 1.11% | 7.77%  | 4.89% | 6.07% | 253.9 | 0.052 |
| 231 | 0.98 | 5 | 12,105 | 240.3 | 242.2 | 65 | 1.50% | 9.89%  | 4.21% | 5.75% | 253.5 | 0.052 |
| 232 | 0.98 | 5 | 9,079  | 240.4 | 242.2 | 65 | 1.28% | 9.46%  | 4.94% | 6.26% | 254.3 | 0.052 |
| 233 | 0.98 | 5 | 6,053  | 240.4 | 242.2 | 65 | 1.06% | 9.09%  | 5.93% | 7.01% | 255.0 | 0.036 |
| 234 | 0.98 | 4 | 12,105 | 240.3 | 242.2 | 65 | 1.74% | 12.10% | 4.18% | 5.90% | 253.4 | 0.052 |
| 235 | 0.98 | 4 | 6,053  | 240.3 | 242.2 | 65 | 1.24% | 11.62% | 6.00% | 7.19% | 254.9 | 0.034 |
| 236 | 0.98 | 3 | 12,105 | 240.2 | 242.2 | 65 | 2.05% | 15.62% | 4.10% | 6.07% | 253.3 | 0.052 |
| 237 | 0.98 | 3 | 9,079  | 240.5 | 242.2 | 65 | 1.81% | 15.45% | 4.85% | 6.57% | 254.1 | 0.052 |
| 238 | 0.98 | 3 | 6,053  | 240.4 | 242.2 | 65 | 1.53% | 15.23% | 5.95% | 7.32% | 254.8 | 0.034 |
| 239 | 0.98 | 2 | 12,105 | 240.2 | 242.2 | 65 | 2.45% | 20.42% | 3.92% | 6.16% | 253.0 | 0.052 |
| 240 | 0.98 | 2 | 9,079  | 240.4 | 242.2 | 65 | 2.23% | 20.73% | 4.62% | 6.65% | 253.3 | 0.052 |
| 241 | 0.98 | 8 | 12,105 | 240.5 | 242.2 | 80 | 0.80% | 5.18%  | 4.95% | 6.05% | 255.8 | 0.055 |
| 242 | 0.98 | 8 | 9,079  | 240.7 | 242.2 | 80 | 0.67% | 4.86%  | 5.78% | 6.57% | 257.2 | 0.055 |
| 243 | 0.98 | 8 | 6,053  | 240.6 | 242.2 | 80 | 0.55% | 4.44%  | 6.53% | 6.86% | 257.9 | 0.036 |
| 244 | 0.98 | 7 | 12,105 | 240.6 | 242.2 | 80 | 0.93% | 6.25%  | 5.10% | 6.15% | 256.1 | 0.055 |
| 245 | 0.98 | 7 | 9,079  | 240.7 | 242.2 | 80 | 0.77% | 5.86%  | 5.91% | 6.76% | 257.2 | 0.055 |
| 246 | 0.98 | 7 | 6,053  | 240.7 | 242.2 | 80 | 0.62% | 5.41%  | 6.72% | 6.84% | 258.0 | 0.036 |
| 247 | 0.98 | 6 | 9,079  | 240.7 | 242.2 | 80 | 0.89% | 7.11%  | 6.01% | 6.99% | 257.1 | 0.055 |

|     |      |   |        |       |       |    |       |        |       |       |       |       |
|-----|------|---|--------|-------|-------|----|-------|--------|-------|-------|-------|-------|
| 248 | 0.98 | 5 | 12,105 | 240.6 | 242.2 | 80 | 1.26% | 9.29%  | 5.18% | 6.52% | 256.6 | 0.055 |
| 249 | 0.98 | 5 | 9,079  | 240.7 | 242.2 | 80 | 1.05% | 8.96%  | 6.08% | 7.07% | 257.4 | 0.055 |
| 250 | 0.98 | 5 | 6,053  | 240.6 | 242.2 | 80 | 0.85% | 8.44%  | 7.19% | 7.63% | 258.0 | 0.036 |
| 251 | 0.98 | 4 | 12,105 | 240.5 | 242.2 | 80 | 1.49% | 11.67% | 5.15% | 6.66% | 256.5 | 0.055 |
| 252 | 0.98 | 4 | 6,053  | 240.7 | 242.2 | 80 | 1.01% | 10.96% | 7.31% | 7.82% | 258.0 | 0.036 |
| 253 | 0.98 | 3 | 12,105 | 240.5 | 242.2 | 80 | 1.80% | 15.20% | 5.03% | 6.79% | 256.3 | 0.055 |
| 254 | 0.98 | 3 | 9,079  | 240.5 | 242.2 | 80 | 1.55% | 14.85% | 5.98% | 7.40% | 256.9 | 0.052 |
| 255 | 0.98 | 2 | 12,105 | 240.3 | 242.2 | 80 | 2.23% | 20.59% | 4.78% | 6.82% | 255.6 | 0.052 |
| 256 | 0.98 | 2 | 9,079  | 240.6 | 242.2 | 80 | 1.93% | 20.40% | 5.69% | 7.46% | 256.1 | 0.052 |
| 257 | 0.9  | 8 | 12,105 | 220.2 | 222.2 | 50 | 1.53% | 6.75%  | 2.24% | 2.99% | 228.6 | 0.057 |
| 258 | 0.9  | 8 | 9,079  | 220.3 | 222.2 | 50 | 1.42% | 6.53%  | 2.68% | 3.31% | 229.8 | 0.055 |
| 259 | 0.9  | 8 | 6,053  | 220.2 | 222.2 | 50 | 1.15% | 6.19%  | 3.44% | 3.82% | 230.4 | 0.052 |
| 260 | 0.9  | 7 | 12,105 | 220.2 | 222.2 | 50 | 1.69% | 7.81%  | 2.25% | 3.06% | 228.6 | 0.057 |
| 261 | 0.9  | 7 | 9,079  | 220.1 | 222.2 | 50 | 1.57% | 7.49%  | 2.68% | 3.39% | 229.6 | 0.055 |
| 262 | 0.9  | 7 | 6,053  | 220.3 | 222.2 | 50 | 1.30% | 7.31%  | 3.49% | 3.90% | 230.8 | 0.052 |
| 263 | 0.9  | 6 | 12,105 | 220.3 | 222.2 | 50 | 1.87% | 9.07%  | 2.26% | 3.10% | 229.1 | 0.057 |
| 264 | 0.9  | 6 | 9,079  | 220.2 | 222.2 | 50 | 1.79% | 8.86%  | 2.72% | 3.47% | 229.9 | 0.057 |
| 265 | 0.9  | 6 | 6,053  | 220.1 | 222.2 | 50 | 1.47% | 8.47%  | 3.52% | 3.96% | 231.0 | 0.057 |
| 266 | 0.9  | 5 | 12,105 | 220.1 | 222.2 | 50 | 2.09% | 10.78% | 2.28% | 3.15% | 229.1 | 0.057 |
| 267 | 0.9  | 5 | 9,079  | 220.3 | 222.2 | 50 | 2.02% | 10.54% | 2.73% | 3.52% | 230.1 | 0.055 |
| 268 | 0.9  | 5 | 6,053  | 220.3 | 222.2 | 50 | 1.71% | 10.35% | 3.55% | 4.04% | 231.7 | 0.057 |
| 269 | 0.9  | 4 | 12,105 | 220.2 | 222.2 | 50 | 2.39% | 13.00% | 2.28% | 3.19% | 229.3 | 0.073 |
| 270 | 0.9  | 4 | 9,079  | 220.3 | 222.2 | 50 | 2.31% | 12.74% | 2.74% | 3.56% | 230.2 | 0.057 |
| 271 | 0.9  | 4 | 6,053  | 220.2 | 222.2 | 50 | 2.01% | 12.55% | 3.57% | 4.09% | 231.8 | 0.057 |
| 272 | 0.9  | 3 | 12,105 | 220.2 | 222.2 | 50 | 2.81% | 16.44% | 2.26% | 3.22% | 229.5 | 0.075 |
| 273 | 0.9  | 3 | 9,079  | 220.1 | 222.1 | 50 | 2.73% | 16.32% | 2.72% | 3.60% | 230.1 | 0.060 |
| 274 | 0.9  | 3 | 6,053  | 220.1 | 222.2 | 50 | 2.43% | 16.13% | 3.54% | 4.09% | 232.0 | 0.057 |
| 275 | 0.9  | 2 | 12,105 | 220.0 | 222.2 | 50 | 3.41% | 21.28% | 2.20% | 3.20% | 229.3 | 0.075 |
| 276 | 0.9  | 2 | 9,079  | 220.2 | 222.1 | 50 | 3.33% | 21.36% | 2.65% | 3.56% | 230.2 | 0.057 |
| 277 | 0.9  | 2 | 6,053  | 220.3 | 222.2 | 50 | 3.06% | 21.47% | 3.47% | 4.06% | 232.1 | 0.057 |
| 278 | 0.8  | 8 | 12,105 | 220.1 | 222.1 | 50 | 2.14% | 6.29%  | 2.29% | 2.54% | 228.3 | 0.057 |
| 279 | 0.8  | 8 | 6,053  | 220.3 | 222.2 | 50 | 1.38% | 5.81%  | 3.80% | 3.26% | 230.8 | 0.057 |
| 280 | 0.8  | 7 | 12,105 | 220.1 | 222.1 | 50 | 2.39% | 7.19%  | 2.32% | 2.59% | 228.4 | 0.057 |
| 281 | 0.8  | 7 | 9,079  | 220.2 | 222.1 | 50 | 2.10% | 7.03%  | 2.86% | 2.84% | 229.6 | 0.055 |
| 282 | 0.8  | 7 | 6,053  | 220.3 | 222.1 | 50 | 1.58% | 6.79%  | 3.87% | 3.30% | 231.2 | 0.057 |
| 283 | 0.8  | 6 | 12,105 | 220.1 | 222.1 | 50 | 2.75% | 8.44%  | 2.34% | 2.59% | 228.5 | 0.057 |
| 284 | 0.8  | 6 | 9,079  | 220.3 | 222.1 | 50 | 2.42% | 8.17%  | 2.90% | 2.86% | 229.7 | 0.060 |
| 285 | 0.8  | 6 | 6,053  | 220.3 | 222.2 | 50 | 1.85% | 8.00%  | 3.93% | 3.32% | 231.7 | 0.057 |
| 286 | 0.8  | 5 | 9,079  | 220.3 | 222.2 | 50 | 2.82% | 9.85%  | 2.92% | 2.89% | 229.9 | 0.055 |
| 287 | 0.8  | 4 | 12,105 | 220.2 | 222.1 | 50 | 3.69% | 12.12% | 2.34% | 2.63% | 229.0 | 0.075 |
| 288 | 0.8  | 4 | 9,079  | 220.2 | 222.1 | 50 | 3.38% | 11.94% | 2.92% | 2.88% | 230.0 | 0.060 |
| 289 | 0.8  | 4 | 6,053  | 220.3 | 222.2 | 50 | 2.73% | 11.95% | 4.03% | 3.31% | 232.1 | 0.055 |

|     |      |   |        |       |       |    |       |        |       |       |       |       |
|-----|------|---|--------|-------|-------|----|-------|--------|-------|-------|-------|-------|
| 290 | 0.8  | 3 | 12,105 | 220.0 | 222.1 | 50 | 4.51% | 15.30% | 2.31% | 2.60% | 229.0 | 0.075 |
| 291 | 0.8  | 3 | 6,053  | 220.3 | 222.2 | 50 | 3.43% | 15.25% | 4.04% | 3.23% | 232.3 | 0.055 |
| 292 | 0.8  | 2 | 12,105 | 220.1 | 222.2 | 50 | 5.74% | 19.79% | 2.24% | 2.47% | 229.0 | 0.075 |
| 293 | 0.8  | 2 | 9,079  | 220.1 | 222.2 | 50 | 5.41% | 20.05% | 2.81% | 2.73% | 229.8 | 0.060 |
| 294 | 0.8  | 2 | 6,053  | 220.3 | 222.1 | 50 | 4.59% | 20.18% | 3.96% | 3.08% | 232.2 | 0.055 |
| 295 | 0.7  | 8 | 12,105 | 220.2 | 222.1 | 50 | 2.78% | 5.74%  | 2.39% | 2.14% | 227.8 | 0.057 |
| 296 | 0.7  | 8 | 9,079  | 220.2 | 222.1 | 50 | 2.33% | 5.47%  | 3.06% | 2.37% | 229.2 | 0.055 |
| 297 | 0.7  | 7 | 12,105 | 220.2 | 222.1 | 50 | 3.17% | 6.57%  | 2.42% | 2.16% | 228.0 | 0.057 |
| 298 | 0.7  | 7 | 6,053  | 220.3 | 222.1 | 50 | 1.87% | 6.23%  | 4.39% | 2.83% | 231.4 | 0.057 |
| 299 | 0.7  | 6 | 12,105 | 220.1 | 222.2 | 50 | 3.64% | 7.51%  | 2.43% | 2.16% | 228.1 | 0.057 |
| 300 | 0.7  | 6 | 9,079  | 220.4 | 222.1 | 50 | 3.19% | 7.48%  | 3.13% | 2.35% | 229.5 | 0.055 |
| 301 | 0.7  | 6 | 6,053  | 220.3 | 222.1 | 50 | 2.27% | 7.41%  | 4.51% | 2.80% | 231.6 | 0.057 |
| 302 | 0.7  | 5 | 12,105 | 220.1 | 222.1 | 50 | 4.32% | 8.97%  | 2.43% | 2.17% | 228.2 | 0.057 |
| 303 | 0.7  | 5 | 9,079  | 220.3 | 222.1 | 50 | 3.77% | 8.94%  | 3.14% | 2.33% | 229.6 | 0.060 |
| 304 | 0.7  | 5 | 6,053  | 220.4 | 222.1 | 50 | 2.77% | 8.92%  | 4.60% | 2.76% | 231.9 | 0.057 |
| 305 | 0.7  | 4 | 9,079  | 220.3 | 222.2 | 50 | 4.68% | 11.00% | 3.13% | 2.33% | 229.6 | 0.060 |
| 306 | 0.7  | 3 | 12,105 | 220.1 | 222.1 | 50 | 6.56% | 13.70% | 2.37% | 2.09% | 228.5 | 0.075 |
| 307 | 0.7  | 2 | 12,105 | 220.2 | 222.1 | 50 | 8.66% | 18.26% | 2.27% | 1.98% | 228.6 | 0.078 |
| 308 | 0.95 | 8 | 12,105 | 220.1 | 222.1 | 50 | 1.29% | 7.01%  | 2.22% | 3.28% | 228.9 | 0.060 |
| 309 | 0.95 | 8 | 9,079  | 220.3 | 222.1 | 50 | 1.24% | 6.81%  | 2.62% | 3.64% | 229.7 | 0.055 |
| 310 | 0.95 | 8 | 6,053  | 220.2 | 222.2 | 50 | 1.07% | 6.48%  | 3.32% | 4.15% | 230.5 | 0.055 |
| 311 | 0.95 | 7 | 12,105 | 220.2 | 222.2 | 50 | 1.40% | 8.05%  | 2.22% | 3.33% | 229.0 | 0.057 |
| 312 | 0.95 | 7 | 9,079  | 220.2 | 222.1 | 50 | 1.36% | 7.77%  | 2.62% | 3.72% | 229.7 | 0.055 |
| 313 | 0.95 | 7 | 6,053  | 220.1 | 222.1 | 50 | 1.18% | 7.41%  | 3.33% | 4.24% | 230.8 | 0.057 |
| 314 | 0.95 | 6 | 9,079  | 220.2 | 222.2 | 50 | 1.50% | 9.09%  | 2.63% | 3.80% | 229.8 | 0.055 |
| 315 | 0.95 | 5 | 12,105 | 220.1 | 222.1 | 50 | 1.65% | 11.14% | 2.25% | 3.47% | 229.1 | 0.057 |
| 316 | 0.95 | 5 | 9,079  | 220.2 | 222.1 | 50 | 1.66% | 10.86% | 2.66% | 3.89% | 230.0 | 0.057 |
| 317 | 0.95 | 5 | 6,053  | 220.1 | 222.1 | 50 | 1.50% | 10.57% | 3.38% | 4.45% | 231.5 | 0.055 |
| 318 | 0.95 | 4 | 12,105 | 220.1 | 222.1 | 50 | 1.84% | 13.43% | 2.25% | 3.53% | 229.2 | 0.055 |
| 319 | 0.95 | 4 | 6,053  | 220.3 | 222.1 | 50 | 1.73% | 12.95% | 3.38% | 4.56% | 231.8 | 0.055 |
| 320 | 0.95 | 3 | 12,105 | 220.2 | 222.1 | 50 | 2.05% | 16.88% | 2.23% | 3.58% | 229.3 | 0.055 |
| 321 | 0.95 | 3 | 9,079  | 220.2 | 222.1 | 50 | 2.14% | 16.56% | 2.63% | 4.04% | 230.4 | 0.057 |
| 322 | 0.95 | 3 | 6,053  | 220.1 | 222.1 | 50 | 2.01% | 16.46% | 3.34% | 4.63% | 231.8 | 0.055 |
| 323 | 0.95 | 2 | 12,105 | 220.0 | 222.1 | 50 | 2.41% | 22.07% | 2.18% | 3.57% | 229.2 | 0.055 |
| 324 | 0.95 | 2 | 9,079  | 220.2 | 222.1 | 50 | 2.50% | 21.77% | 2.57% | 4.04% | 230.2 | 0.057 |

## NMR liquid phase measurement

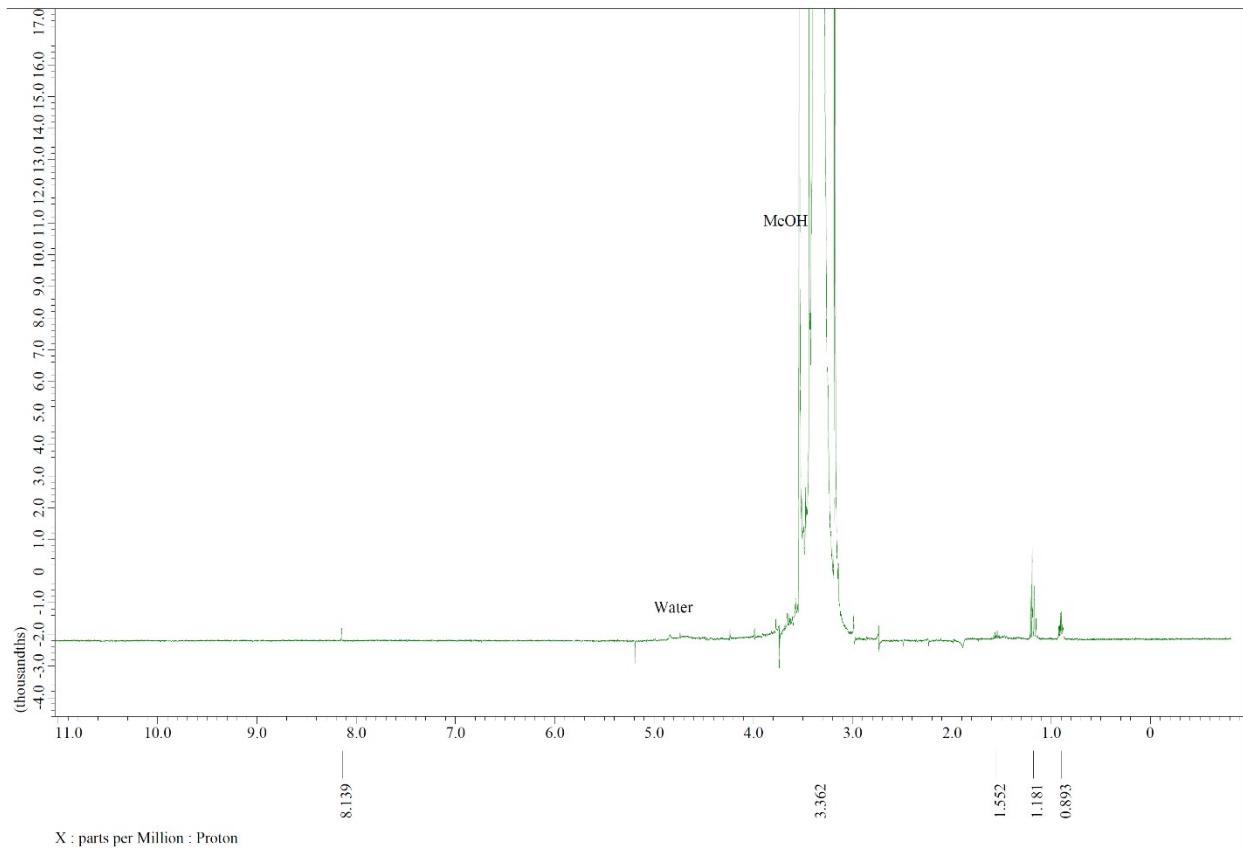

Figure 1: NMR measurement of a liquid phase sample;  $^1\text{H}$  NMR (400 MHz,  $\text{D}_2\text{O}$ ):  $\delta/\text{ppm} = 8,139$  (s,  $\text{HCOOH}$ , traces), 4,8 (s,  $\text{H}_2\text{O}$ ), 3,362 (s,  $\text{CH}_3\text{OH}$ ;  $\text{CH}_3\text{CH}_2\text{OH}$  and  $\text{CH}_3\text{CH}_2\text{CH}_2\text{OH}$  is covered by  $\text{CH}_3\text{OH}$ ), 1,552 (m,  $\text{CH}_3\text{CH}_2\text{CH}_2\text{OH}$ ), 1,181 (t,  $\text{CH}_3\text{CH}_2\text{OH}$ ), 0,893 (t,  $\text{CH}_3\text{CH}_2\text{CH}_2\text{OH}$ ).

## References

1. G. H. Graaf, E. J. Stamhuis and A. Beenackers, *Chemical Engineering Science*, 1988, **43**, 3185.
2. G. H. Graaf, H. Scholtens, E. J. Stamhuis and A. Beenackers, *Chemical Engineering Science*, 1990, **45**, 773.
3. K. M. Vanden Bussche and G. F. Froment, *Journal of Catalysis*, 1996, **161**, 1.
4. F. Nestler, A. R. Schütze, M. Ouda, M. J. Hadrich, A. Schaadt, S. Bajohr and T. Kolb, *Chemical Engineering Journal*, 2020, **394**, 124881.
5. T. Henkel, *Modellierung von Reaktion und Stofftransport in geformten Katalysatoren am Beispiel der Methanolsynthese*, PhD thesis, 2011.
